# Supplementary material for: Iridium-promoted conversion of terminal epoxides to primary alcohols under acidic conditions using hydrogen
Source: Royal Society of Chemistry journal article supplement (doi:10.1039/c9cy00791a), 2019-01-01
Supplement: c9cy00791a1.pdf [file c9cy00791a1.pdf]

## Iridium-promoted conversion of terminal epoxides to primary alcohols under acidic conditions using hydrogen

Alena N. Rainsberry, Jarrod G. Sage, and Margaret L. Scheuermann\*

Department of Chemistry  
Western Washington University  
516 High Street - MS-9150  
Bellingham WA, 98225  
Email: [margaret.scheuermann@wwu.edu](mailto:margaret.scheuermann@wwu.edu)

### Contents

|                                                       |   |
|-------------------------------------------------------|---|
| General considerations.....                           | 2 |
| Typical hydrogenation procedure. ....                 | 2 |
| GC-FID data for Table 1.....                          | 3 |
| <sup>1</sup> H NMR spectra of isolated products ..... | 8 |

## General considerations

(POCOP)IrCO,<sup>1</sup> indene oxide,<sup>2</sup> benzyloxirane,<sup>3,4</sup> and 2-methyl-2-phenyloxirane<sup>4</sup> were prepared as previously reported. All other chemicals and solvents were obtained from commercial vendors and used as received.

GC-MS data was collected using an Agilent 6890-5873 GC-MS equipped with an HP-5MS column (30 m x 0.25 mm x 0.25  $\mu$ m). GC-FID data was collected using an Agilent 7890A GC-FID equipped with an HP-5 column (30m x 0.32 mm x 0.25  $\mu$ m). NMR spectra were recorded on a Bruker AV500 spectrometer in CDCl<sub>3</sub> solvent.

Catalytic reactions were performed in a 10 mL high pressure reactor fitted with a PTFE liner and equipped with a pressure sensor and a programmable temperature controller. A new liner and stirbar were used for each reaction. A PTFE lid with a small hole for gas equilibration was placed on top of the liner. The well holding the thermocouple probe was covered with a heat-shrinkable PFA probe cover. These covers were purchased from Tef-Cap Industries Inc.

## Typical hydrogenation procedure.

In air the reactor was charged with the epoxide substrate (1.4 mmol), dioxane (0.7 mL), (POCOP)IrCO (5.0 mg, 0.0081 mmol, 0.60 mol %), triflic acid (aq, 0.681 M, 0.010 mL, 0.50 mol %), and decane (25  $\mu$ L). The reactor was pressurized to 600 psi at room temperature. With magnetic stirring, the reactor was heated to 35 °C for 90 min then ramped to a temperature of 195 °C over 30 min. The reaction was held at 195 °C for 15 hours then allowed to cool to room temperature. The reactor was then vented. The reaction mixture was filtered through Celite ®. The reactor was thoroughly rinsed with THF (total volume, 5 mL). The rinses were filtered through Celite ® and combined with the reaction mixture. A sample of the filtrate (approximately 0.2 mL) was diluted using THF (final volume approximately 1.5 mL). The sample was then analyzed by GC-MS and GC-FID. Alcohol products were identified by comparison to authentic standards and quantified using calibration curves constructed using authentic samples. Isolated products were obtained after filtration through a plug of MgSO<sub>4</sub> and column chromatography on silica gel with hexanes and ethyl acetate (1:1 mixture) as the eluant.

**1-Octanol.** (87 mg, 48 %). Colorless oil. The <sup>1</sup>H NMR spectrum is consistent with previously reported data.<sup>5,6</sup> <sup>1</sup>H NMR (CDCl<sub>3</sub>, 500 MHz, 298 K)  $\delta$  3.65 (t, *J* = 6.7 Hz, 2H), 1.90 (br, 1H), 1.58 (m 2H), 1.31 (m, 10H), 0.90 (t, *J* = 6.9 Hz, 3H).

**1-Dodecanol.** (130 mg, 50 %). Colorless oil. The <sup>1</sup>H NMR spectrum is consistent with previously reported data.<sup>7</sup> <sup>1</sup>H NMR (CDCl<sub>3</sub>, 500 MHz, 298 K)  $\delta$  3.62 (t, *J* = 6.7 Hz, 2H), 2.05 (br, 1H), 1.56 (m 2H), 1.27 (m, 16H), 0.88 (t, *J* = 7.0 Hz, 3H).

**3-Phenylpropanol.** (71 mg, 38 %). Pale yellow oil. The <sup>1</sup>H NMR spectrum is consistent with previously reported data.<sup>5,8</sup> <sup>1</sup>H NMR (CDCl<sub>3</sub>, 500 MHz, 298 K)  $\delta$  7.33 (m, 2H), 7.25 (m, 3H), 3.71 (t, *J* = 6.5 Hz, 2H), (br, 1H), 2.75 (m, 2H), 1.94 (m, 2H).

**2-Phenylethanol.** (124 mg, 72 %). Colorless oil. The <sup>1</sup>H NMR spectrum is consistent with previously reported data.<sup>9,10</sup> <sup>1</sup>H NMR (CDCl<sub>3</sub>, 500 MHz, 298 K)  $\delta$  7.35 (m, 2H), 7.27 (m, 3H), 3.86 (t, *J* = 6.7 Hz, 2H), 2.89 (t, *J* = 6.7 Hz, 2H), 2.18 (br, 1H).

**2-Phenylpropanol.** (106 mg, 53 %). Pale yellow oil. The <sup>1</sup>H NMR spectrum is consistent with previously reported data.<sup>10,11</sup> <sup>1</sup>H NMR (CDCl<sub>3</sub>, 500 MHz, 298 K) δ 7.37 (m, 2H), 7.29 (m, 3H), 3.74 (d, *J* = 6.8 Hz, 2H), 2.98 (m, 1H), 2.56 (br, 1H), 1.31 (d, *J* = 7.0 Hz, 3H).

**2-Indanol.** (63 mg, 35 %). Off white solid. The <sup>1</sup>H NMR spectrum is consistent with previously reported data.<sup>10,12</sup> <sup>1</sup>H NMR (CDCl<sub>3</sub>, 500 MHz, 298 K) δ 7.28 (m, 2H), 7.20 (m, 2H), 4.71 (m, 1H), 3.24 (dd, *J* = 16.4, 5.9 Hz, 2H), 2.94 (dd, *J* = 16.3, 3.2 Hz, 2H), 2.04 (br, 1H).

**Cyclopentylmethanol.** (35 mg, 26 %). Pale yellow oil. The <sup>1</sup>H NMR spectrum is consistent with previously reported data.<sup>13-14</sup> <sup>1</sup>H NMR (CDCl<sub>3</sub>, 500 MHz, 298 K) δ 3.52 (d, 2H), 2.10 (m, 1H), 1.73 (m, 2H), 1.56 (m, 5H), 1.23 (m, 2H).

### GC-FID data for Table 1

**Table S1.** GC-FID retention times and response factors for products from the reaction of epoxyoctane.

| Compound                    | Retention time (min.) | Response factor (counts/M) |
|-----------------------------|-----------------------|----------------------------|
| THF                         | 2.87                  | n/a                        |
| dioxane                     | 3.88                  | n/a                        |
| octane                      | 6.07                  | 3.07E6                     |
| octene isomers <sup>a</sup> | 5.83-6.40             | 1.75E6                     |
| decane                      | 9.12                  | 2.98E6                     |
| octanal                     | 9.18                  | 1.99E6                     |
| 1-octanol                   | 9.84                  | 2.37E6                     |
| 1,2-octane diol             | 11.22                 | 2.22E6                     |
| THF impurity                | 13.08                 | n/a                        |
| dioctyl ether               | 13.88                 | 4.77E6                     |

<sup>a</sup> The response factor for 4-trans octene was used for all octene isomers.

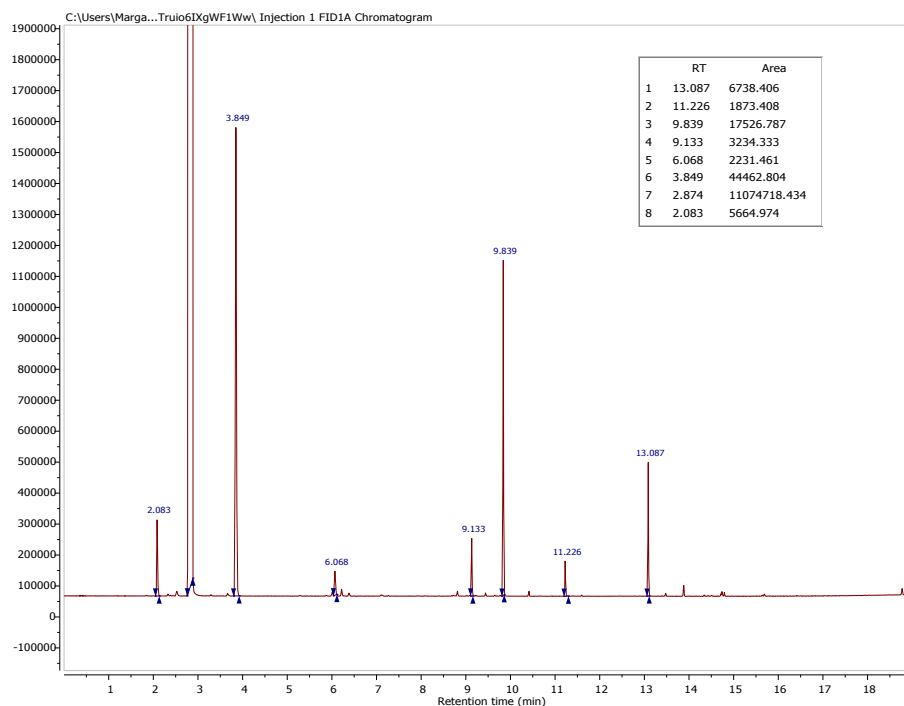

Figure 1. Chromatogram for Table 1 entry 1.

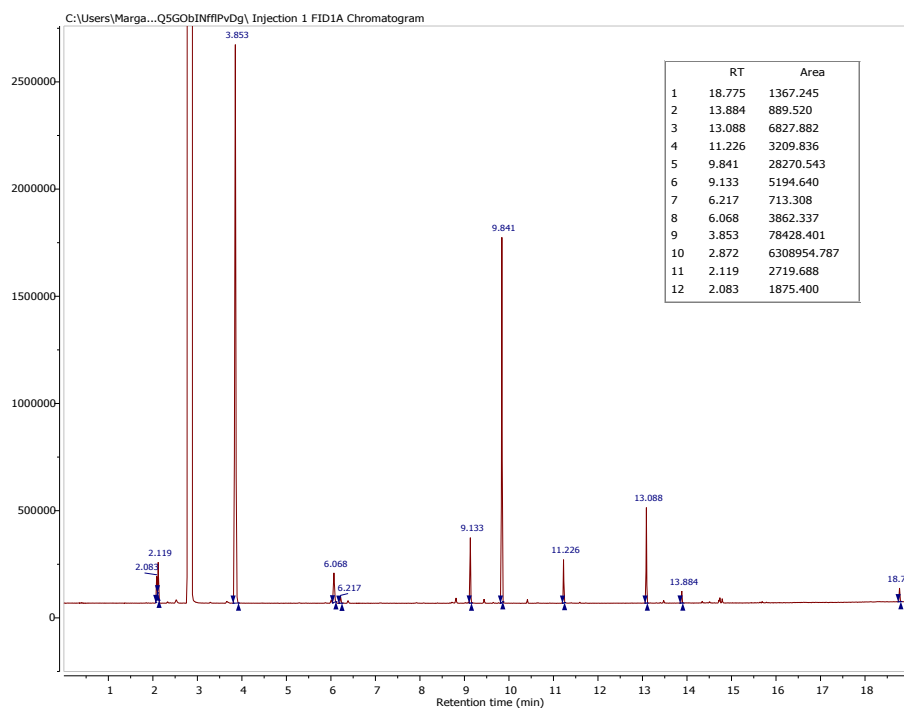

Figure 2. Chromatogram for Table 1 entry 2.

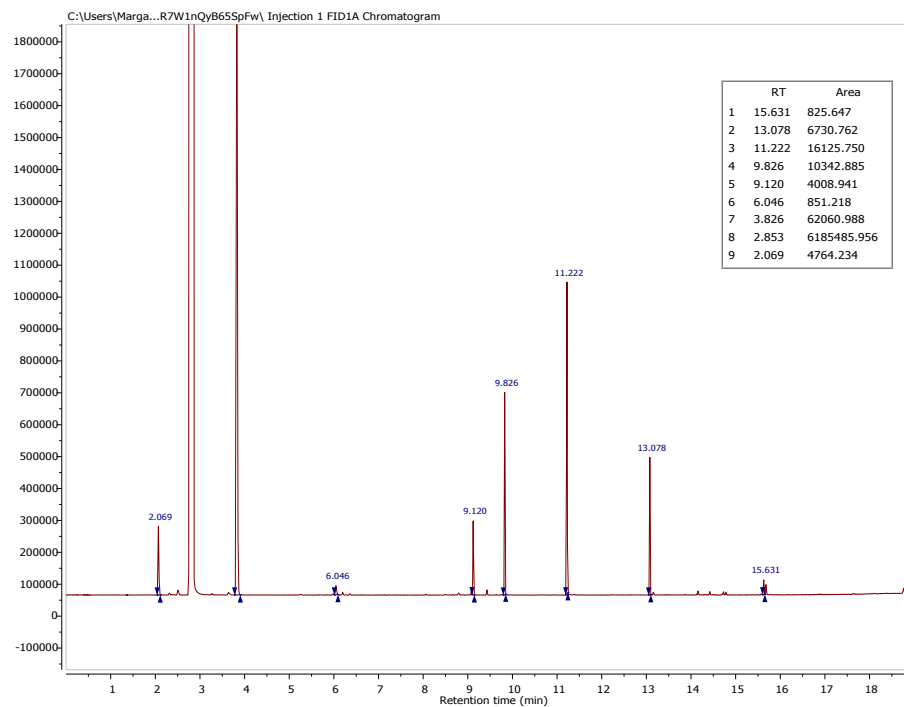

Figure 3. Chromatogram for Table 1 entry 3.

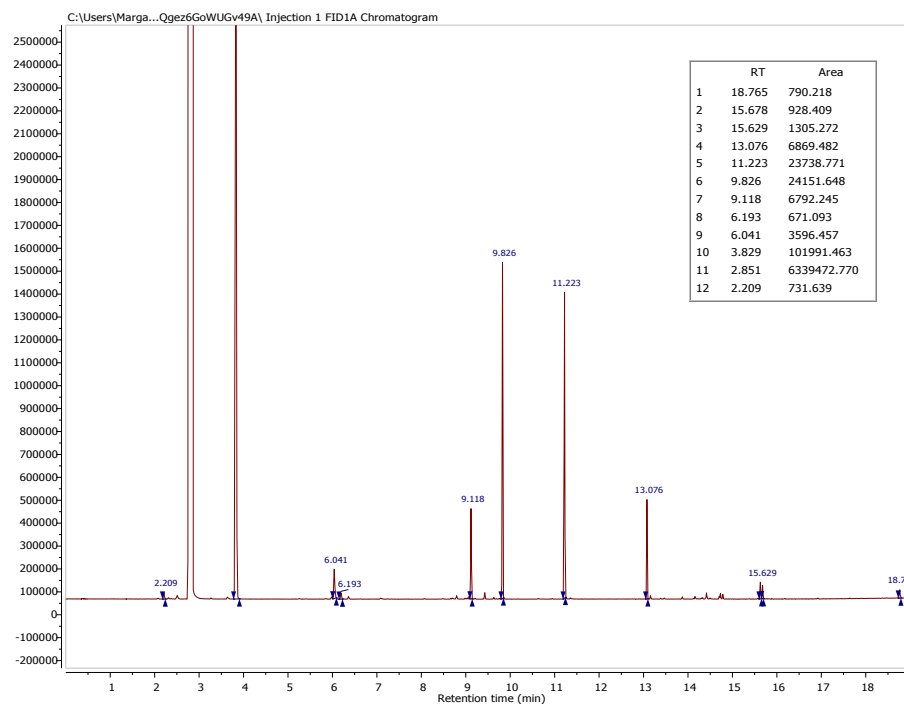

Figure 4. Chromatogram for Table 1 entry 4.

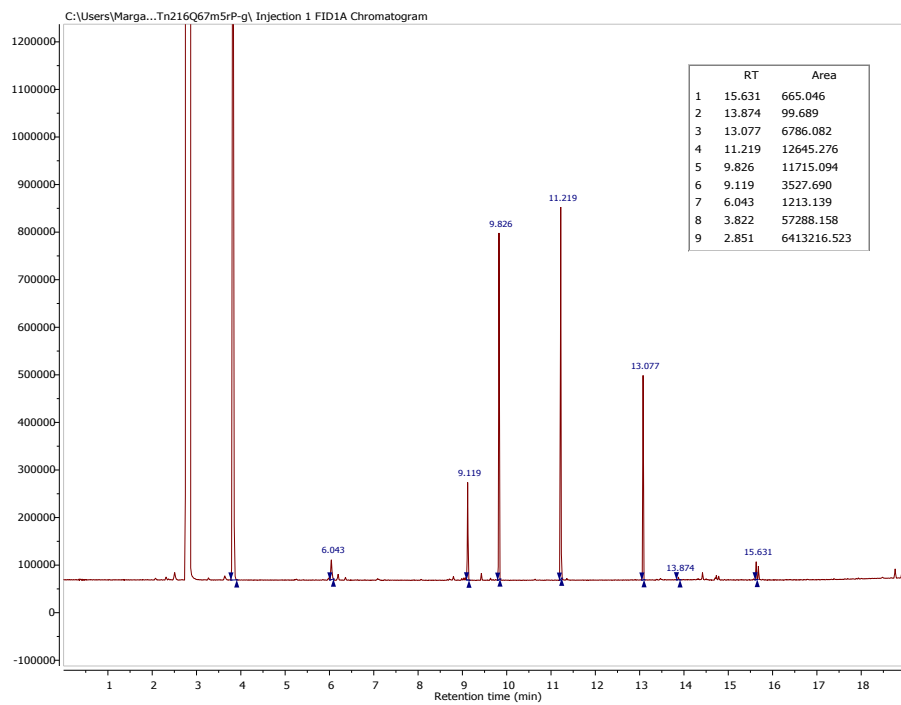

Figure 5. Chromatogram for Table 1 entry 5.

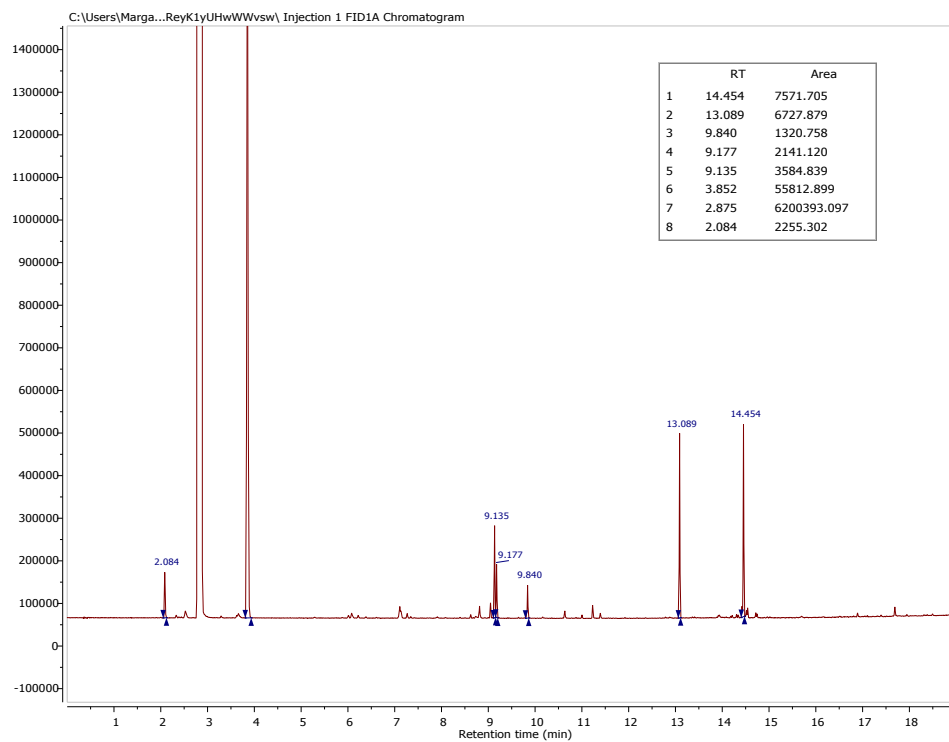

Figure 6. Chromatogram for Table 1 entry 6.

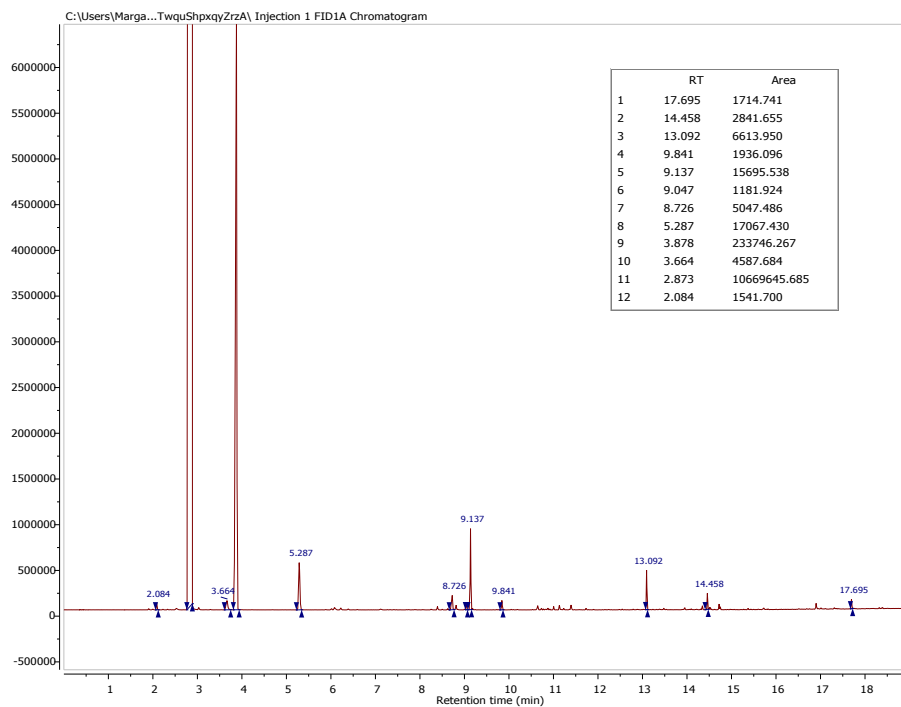

Figure 7. Chromatogram for Table 1 entry 7.

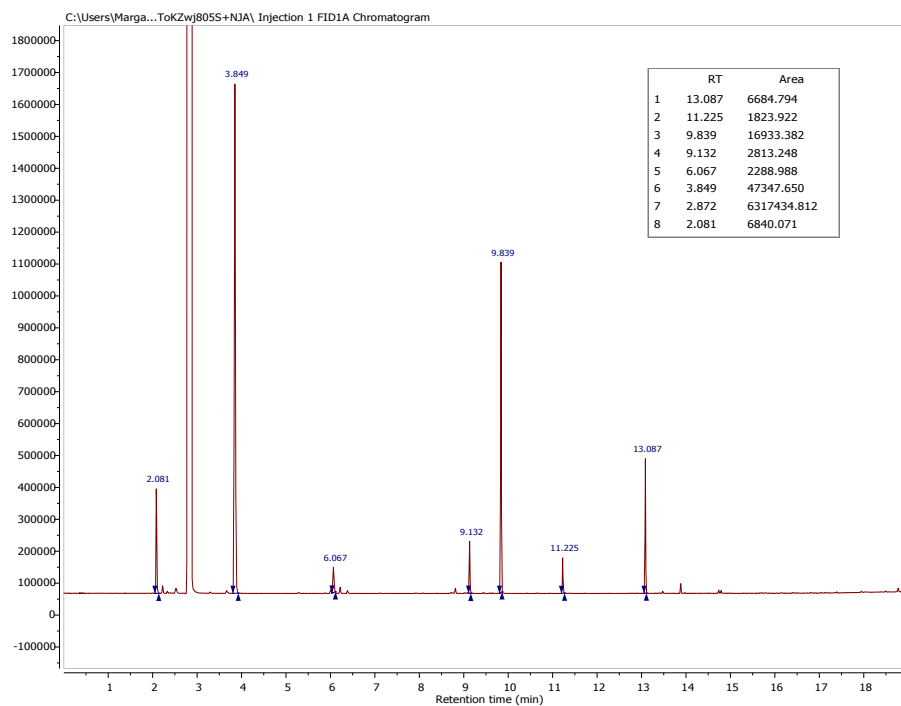

Figure 8. Chromatogram of a reaction starting with 1,2-octane diol rather than epoxyoctane.

### **<sup>1</sup>H NMR spectra of isolated products**

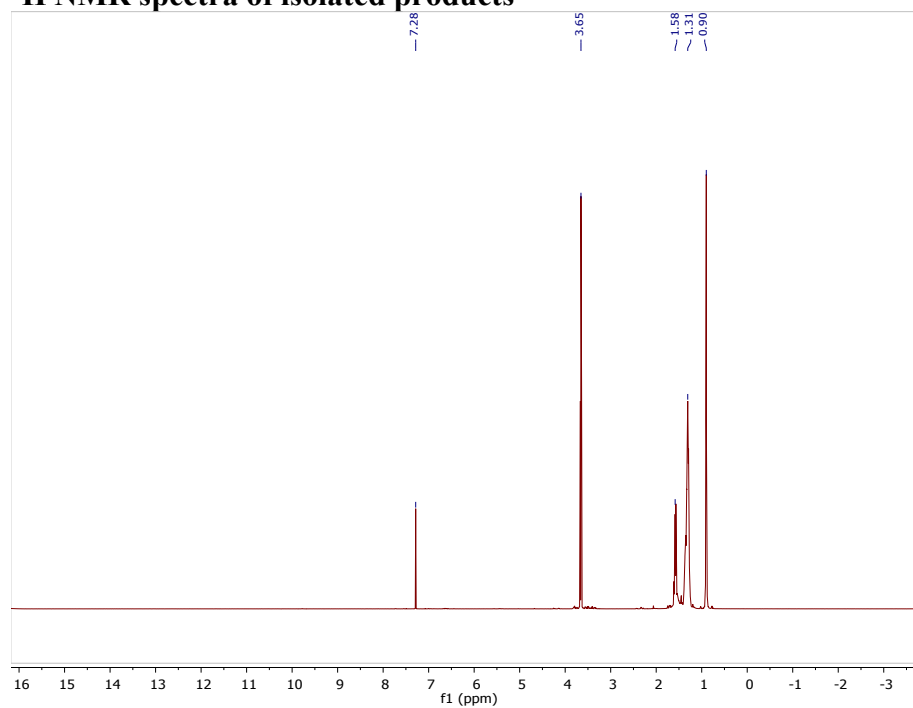

**Figure 6.** <sup>1</sup>H NMR spectrum of 1-octanol (Table 2, Entry 1)

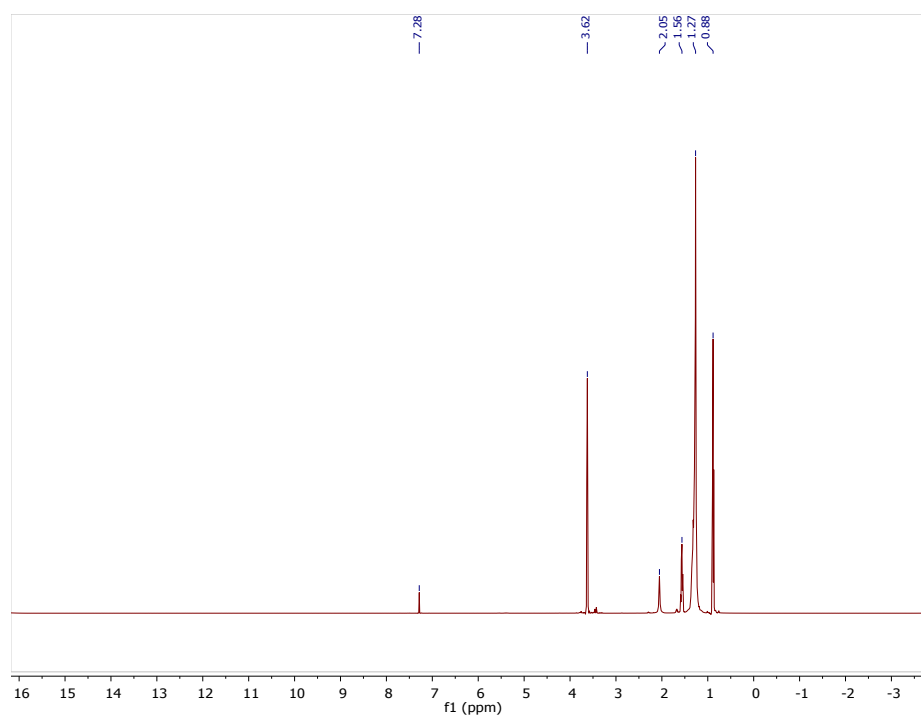

**Figure 7.** <sup>1</sup>H NMR spectrum of 1-dodecanol (Table 2, Entry 2)



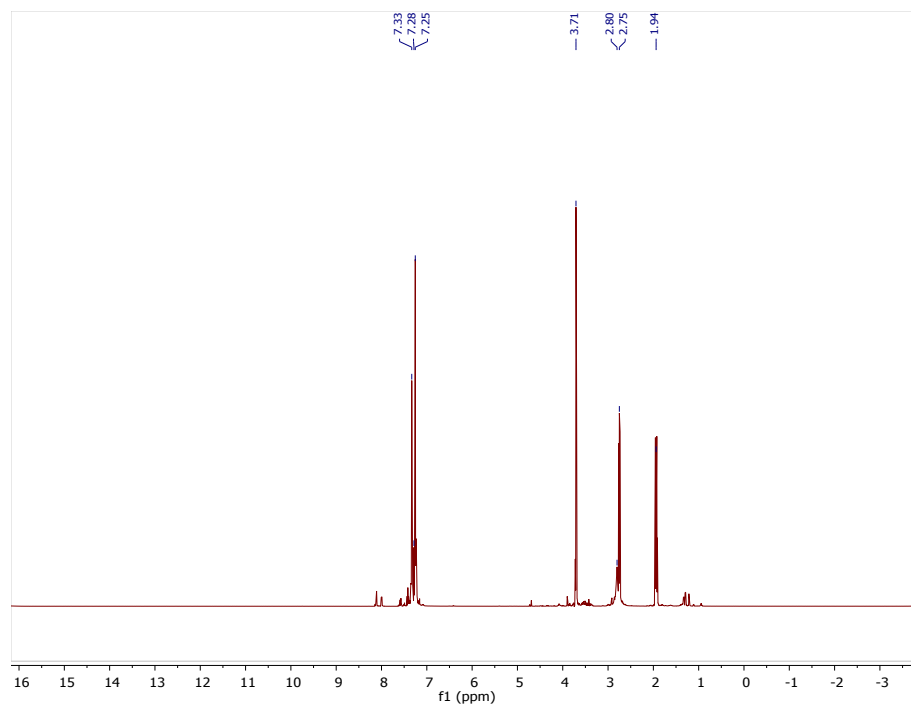

**Figure 8.** <sup>1</sup>H NMR spectrum of 3-phenylpropanol (Table 2, Entry 3)

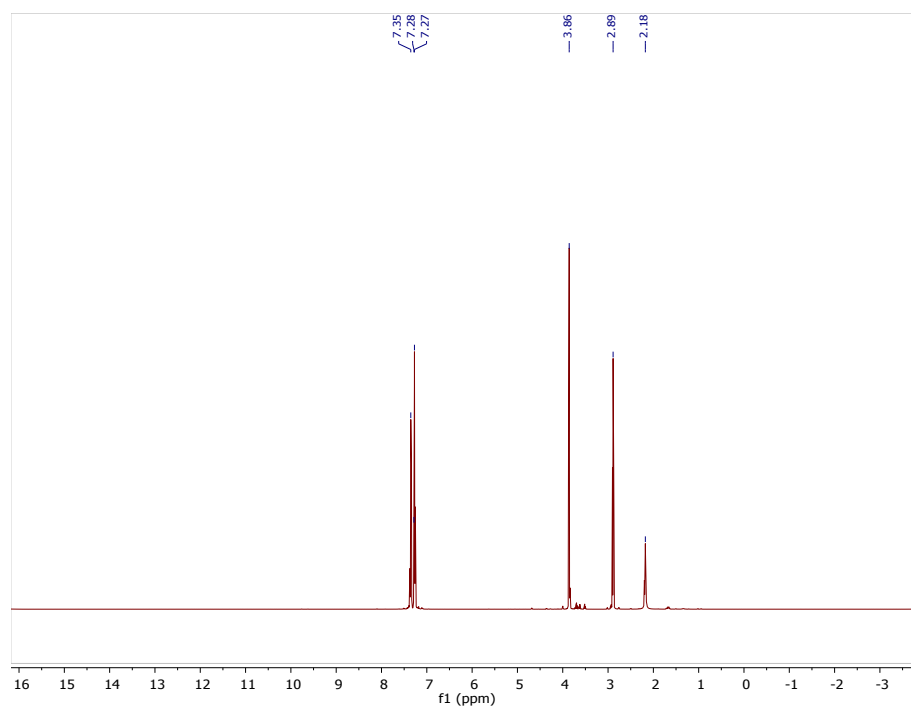

**Figure 9.** <sup>1</sup>H NMR spectrum of 2-phenylethanol (Table 2, Entry 4)

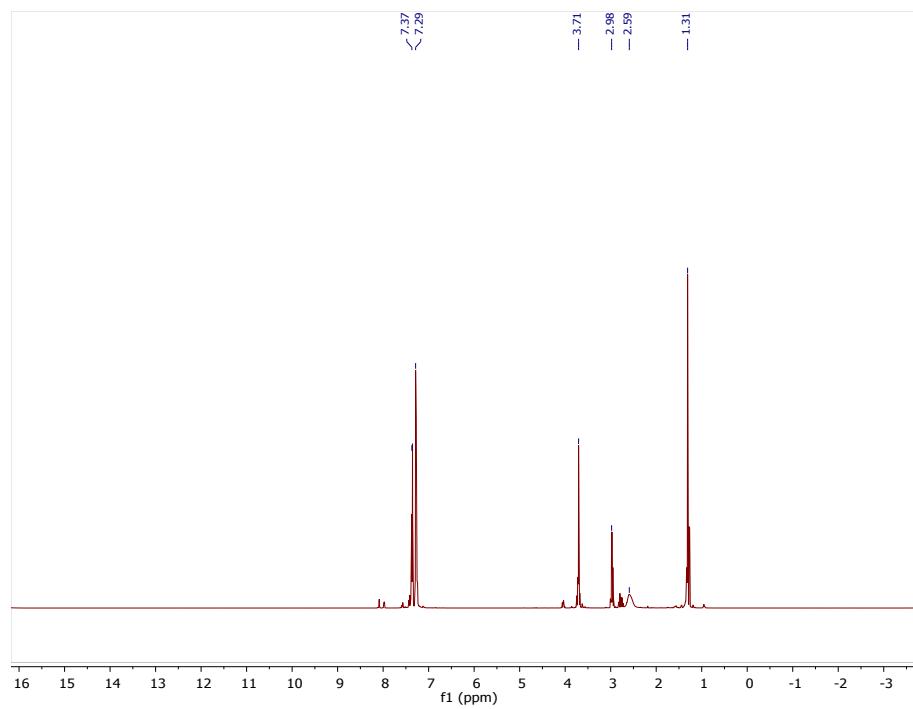

**Figure 10.** <sup>1</sup>H NMR spectrum of 2-phenylpropanol (Table 2, Entry 5)

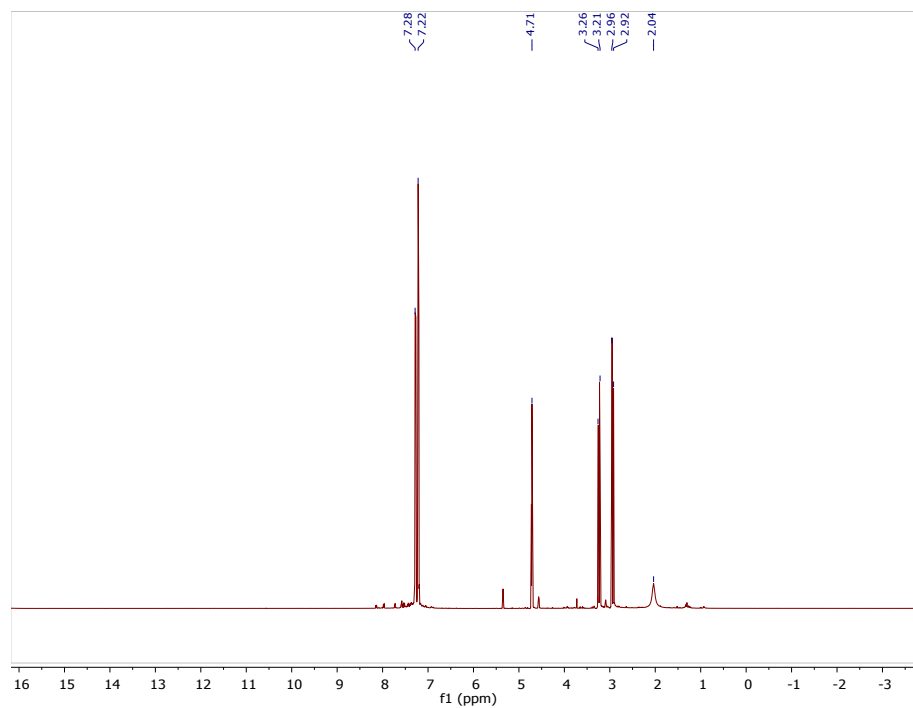

**Figure 11.** <sup>1</sup>H NMR spectrum of 2-indanol (Table 2, Entry 6)

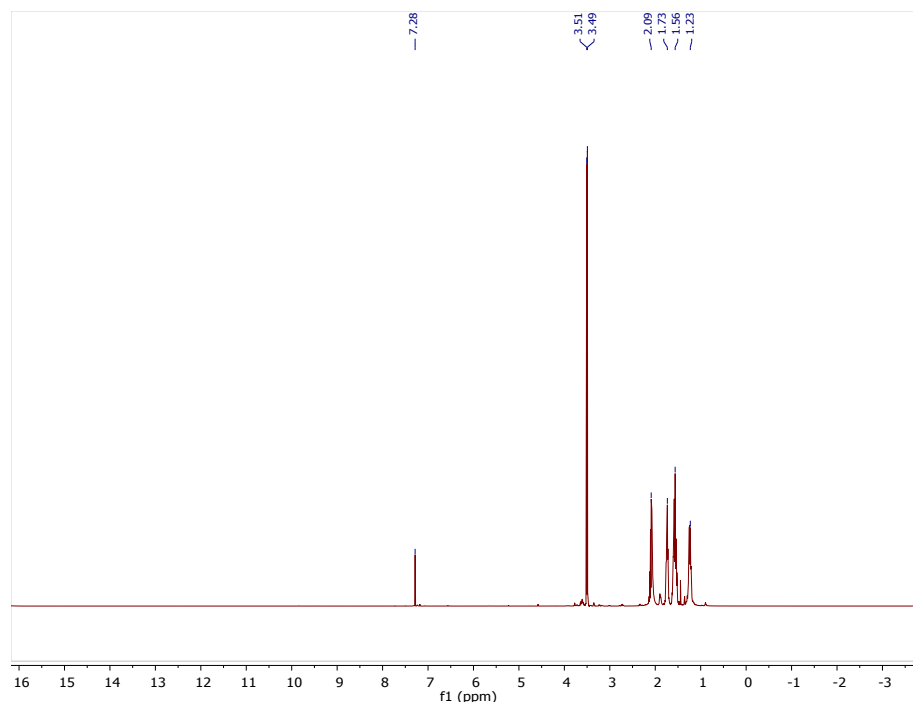

**Figure 12.**  $^1\text{H}$  NMR spectrum of cyclopentanemethanol (Table 2, Entry 7)

<sup>1</sup> Göttker-Schnetmann, I.; White, P. S.; Brookhart, M. Synthesis and Properties of Iridium Bis(phosphinite) Pincer Complexes (p-XPCP)IrH<sub>2</sub>, (p-XPCP)Ir(CO), (p-XPCP)Ir(H)(aryl), and {(p-XPCP)Ir}H<sub>2</sub>{μ-N<sub>2</sub>} and Their Relevance in Alkane Transfer Dehydrogenation. *Organometallics* **2004**, *23*, 1766–1776.

<sup>2</sup> Hashimoto, N.; Kanda, A. Practical and Environmentally Friendly Epoxidation of Olefins Using Oxone. *Org. Process Res. Dev.* **2002**, *6*, 405–406.

<sup>3</sup> Kwon, M. S.; Park, I. S.; Jang, J. S.; Lee, J. S.; Park, J. Magnetically Separable Pd Catalyst for Highly Selective Epoxide Hydrogenolysis under Mild Conditions. *Org. Lett.* **2007**, *9*, 3417–3419.

<sup>4</sup> Murray, S. A.; Liang, M. Z.; Meek, S. J. Stereoselective Tandem Bis-Electrophile Couplings of Diborylmethane. *J. Am. Chem. Soc.* **2017**, *139*, 14061–14064.

<sup>5</sup> *Spectral Database for Organic Compounds (SDBS);  $^1\text{H}$  NMR spectrum*; SDBS No.: 1938; RN 111-87-5; <http://riodb01.ibase.aist.go.jp/sdbs/> (accessed Sept. 6, 2018).

<sup>6</sup> Weng, W. Z.; Liang, H.; Zhang, B. Visible-Light-Mediated Aerobic Oxidation of Organoboron Compounds Using in Situ Generated Hydrogen Peroxide. *Org. Lett.* **2018**, *20*, 4979–4983.

<sup>7</sup> A. P. Dieskau, B. Plietker. A mild ligand-free iron-catalyzed liberation of alcohols from allylcarbonates. *Org. Lett.* **2011**, *13*, 5544–5547.

<sup>8</sup> *Spectral Database for Organic Compounds (SDBS);  $^1\text{H}$  NMR spectrum*; SDBS No.: 2671; RN 122-97-4; <http://riodb01.ibase.aist.go.jp/sdbs/> (accessed Sept. 6, 2018).

<sup>9</sup> *Spectral Database for Organic Compounds (SDBS);  $^1\text{H}$  NMR spectrum*; SDBS No.: 2670; RN 60-12-8; <http://riodb01.ibase.aist.go.jp/sdbs/> (accessed Sept. 6, 2018).

<sup>10</sup> Hu, X.; Zhang, G.; Bu, F.; Lei, A. Visible-Light-Mediated Anti-Markovnikov Hydration of Olefins. *ACS Catal.* **2017**, *7*, 1432–1437.

<sup>11</sup> Szostak, M.; Spain, M.; Procter, D. J. Electron transfer reduction of unactivated esters using SmI<sub>2</sub>-H<sub>2</sub>O. *Chem. Commun.* **2011**, *47*, 10254–10256.

<sup>12</sup> *Spectral Database for Organic Compounds (SDBS);  $^1\text{H}$  NMR spectrum*; SDBS No.: 6339; RN 4254-29-9; <http://riodb01.ibase.aist.go.jp/sdbs/> (accessed Sept. 6, 2018).

<sup>13</sup> *Spectral Database for Organic Compounds (SDBS);  $^1\text{H}$  NMR spectrum*; SDBS No.: 53255; RN 3637-61-4; <http://riodb01.ibase.aist.go.jp/sdbs/> (accessed Sept. 6, 2018).

---

<sup>14</sup> Rieke, R. D.; Wehmeyer, R. M.; Wu, T. C.; Ebert, G. W. New organocopper reagents prepared utilizing highly reactive copper. *Tetrahedron* **1989**, *45*, 443–454.
